# Supplementary material
Source: PubMed Central journal article supplement (PMC8388814)
Supplement: aem.00919-21-s0001.pdf [file aem.00919-21-s0001.pdf]

## Supplementary figures

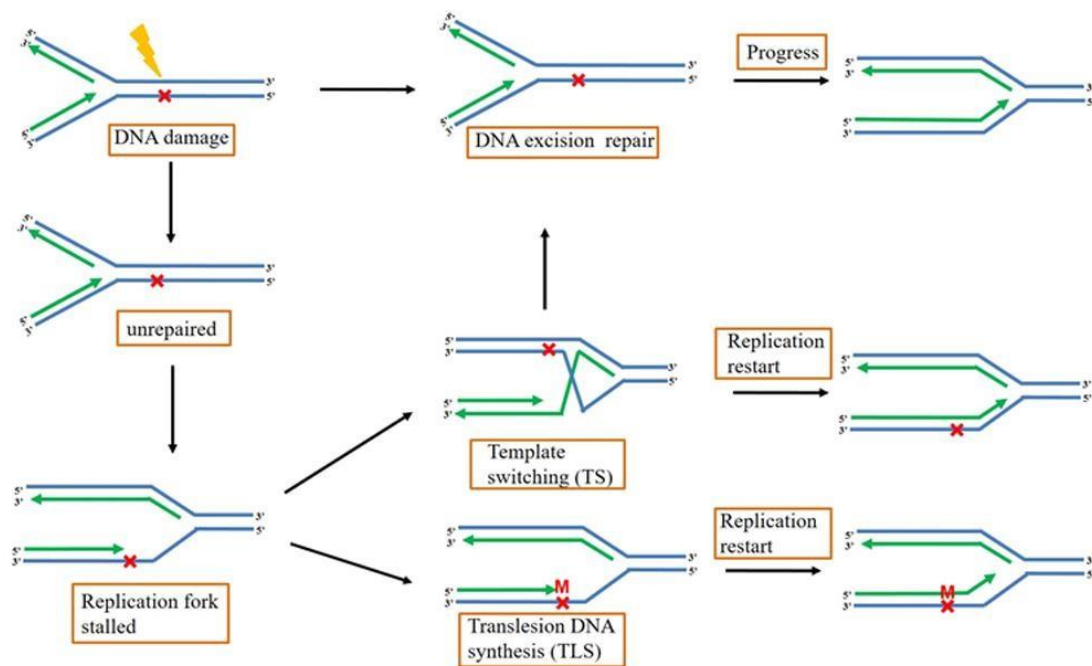

**Figure S1.** Schematic diagram illustrating two bacterial pathways for restarting replication forks. Most base-specific damage is repaired by DNA repair before replication. DNA lesions that is not repaired in time or near the replication fork will stall replication. Two pathways for stalled fork recovery, error-prone translesion DNA synthesis (TLS) and error-free template switching (TS), can bypass the lesions to restart DNA replication downstream. Newly synthesized DNA strand and their templates are shown in green and blue, and 3'-ends of growing DNA chains are shown by arrows. The sites of DNA damage (×) and mutation (M) were shown in red.

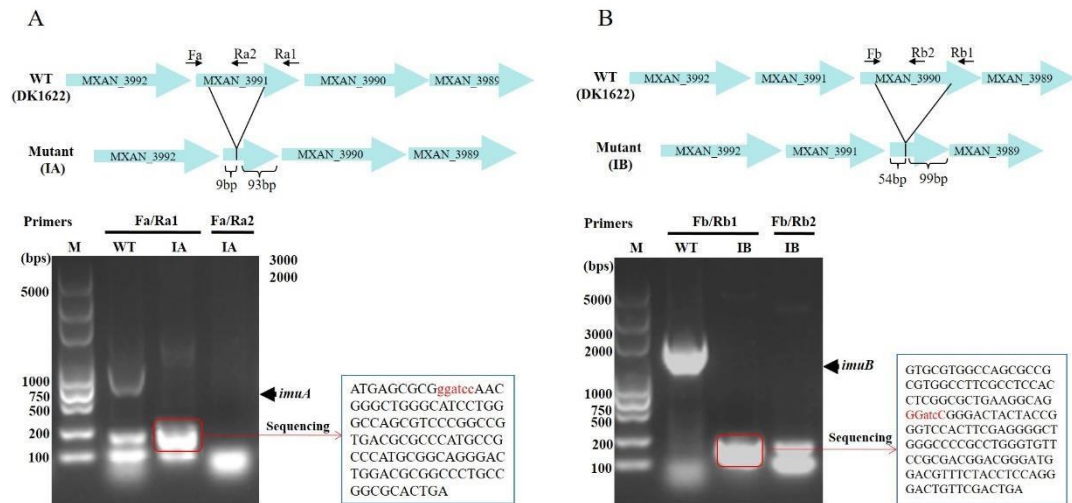

**Figure S2.** Marker-free gene knockout of *imuA* (A) and *imuB* (B) in *M. xanthus* DK1622.

The schematic maps of the location for gene knockout are provided as the upper panel.

In the process of gene knockout, the N- and C-terminal respectively retain some bases

linked by a *Bam*HI recognition sequence (g~~gatcc~~). The lower panel is the PCR

validation of the mutants with primers indicated by black arrows in upper schematic

maps. Further sequencing results of the PCR product from the mutants are shown aside

and the N- and C-terminal residues are linked by *Bam*HI sites (red).

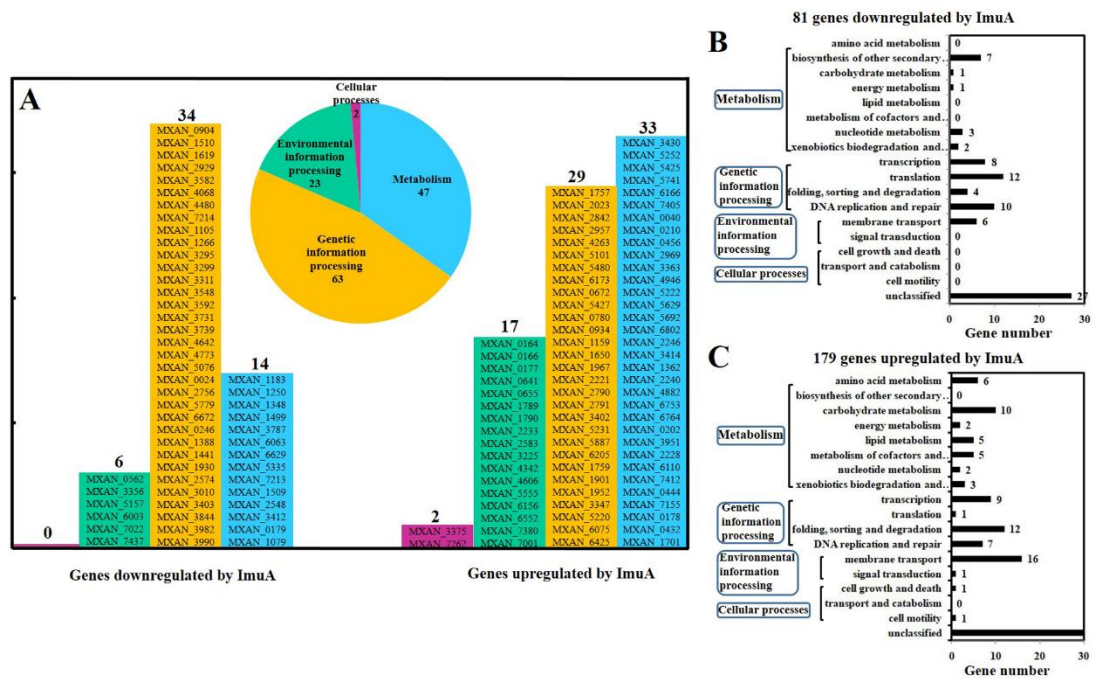

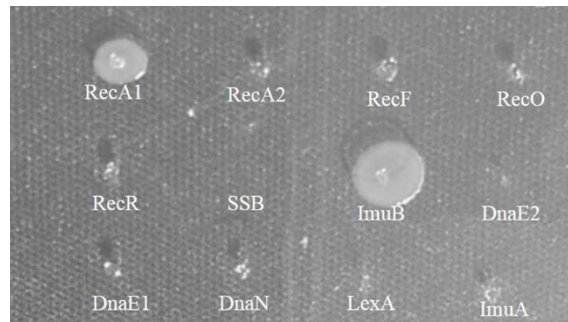

**Figure S4.** Using ImuA as a baiting protein to screen its interacting proteins by Y2H method. ImuA was cloned into pGBKT7 plasmid and used as a bait to screen its interacting proteins among the known replication and recombination proteins in pGADT7 in AH109.

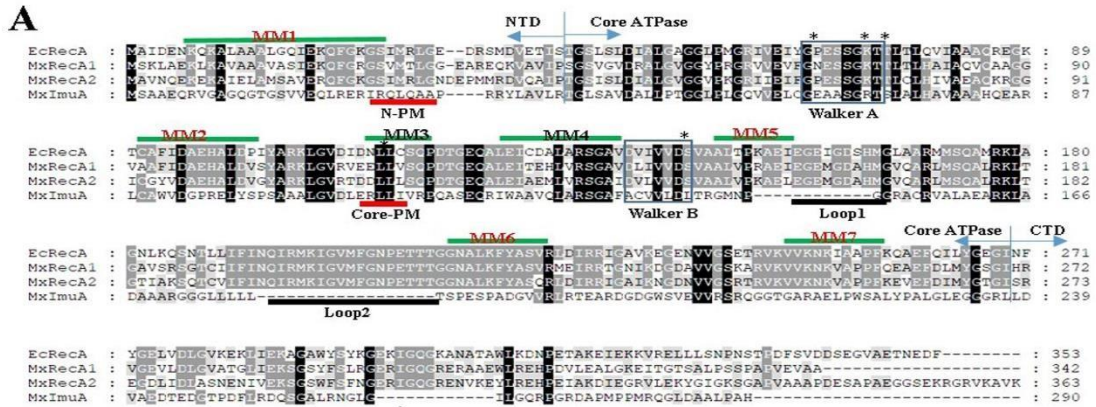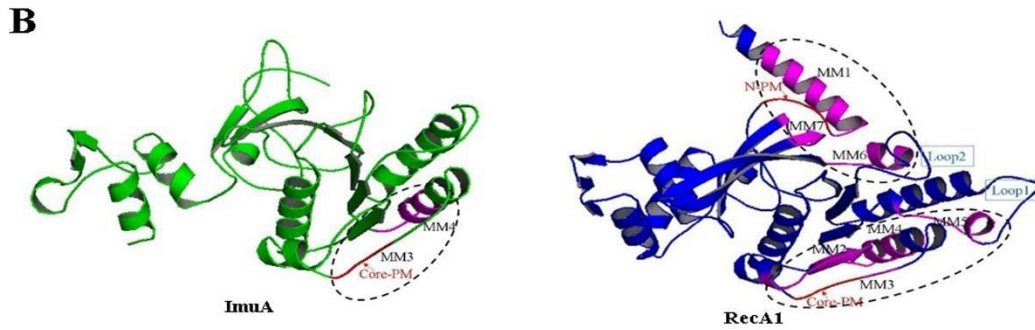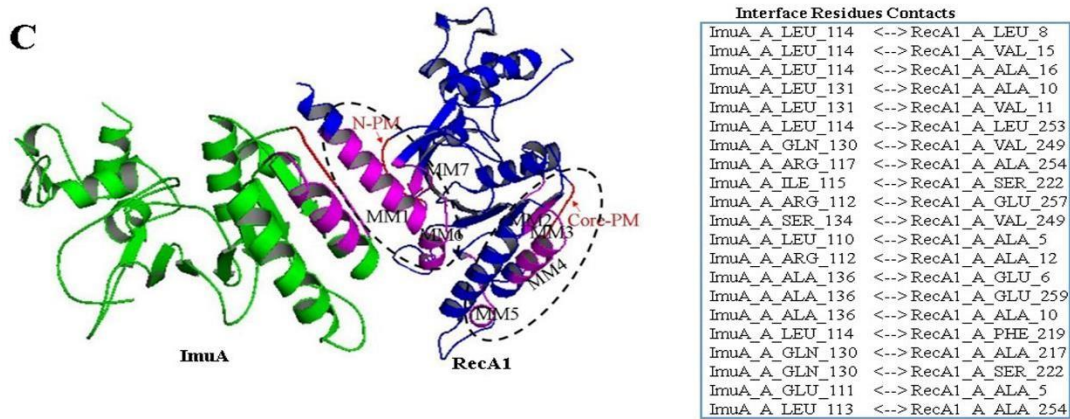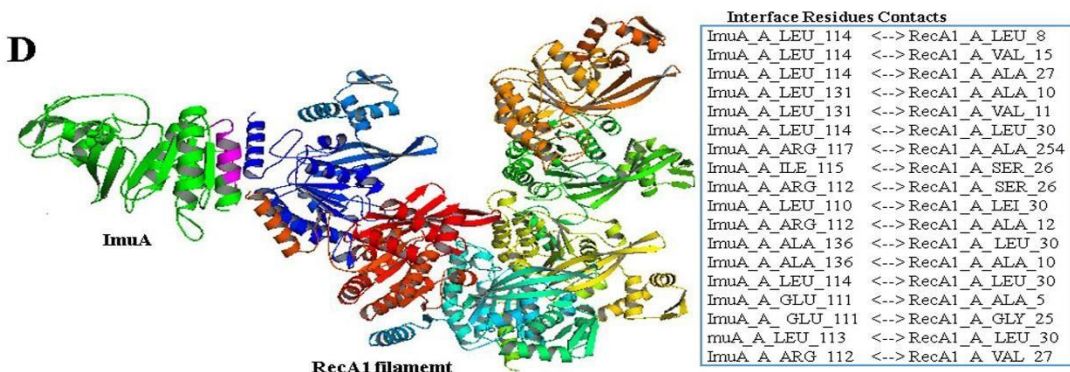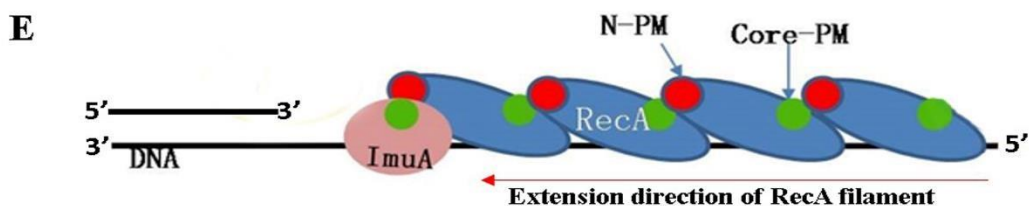

**Figure S5.** Sequence and structure analysis of *M. xanthus* ImuA. (A) Sequence alignment of *M. xanthus* ImuA (MxImuA) with RecA1 (MxRecA1), RecA2 (MxRecA2) and *E. coli* RecA (EcRecA). The ATP binding Walker A and B motifs are marked in blue frame, the putative DNA binding sites (Loop 1 and Loop 2) are underlined in black. Seven monomer binding sites (MM1-7) and two filamentous polymerization sites (NPM and Core-PM) were marked with green and red lines, respectively. Conservative amino acids of Walker A, core-PM and Walker B motifs were marked with asterisks. (B) Three-dimensional structure model of *M. xanthus* ImuA and RecA1. Protein structure was predicted with I-TASSER (<https://zhanglab.ccmb.med.umich.edu/ITASSER>). The binding sites on RecA protein surface were concentrated in two regions, including N-PM and Core-PM respectively. ImuA only retains the binding region with Core-PM. (C) Protein-protein docking prediction of ImuA and RecA1. The interface residues were predicted with PRISM Webserver (<http://cosbi.ku.edu.tr/prism/index.php>). (D) Predicting the interactions between ImuA and RecA1 filament. RecA1 filament structures were built by homology modeling using *E. coli* RecA filament model (PDB ID:1N03) as template. (E) Predicted interaction diagram of *M. xanthus* ImuA with RecA1. N-PM and core-PM are the binding sites located at N-terminal and core ATPase domain of RecA to form polymers.

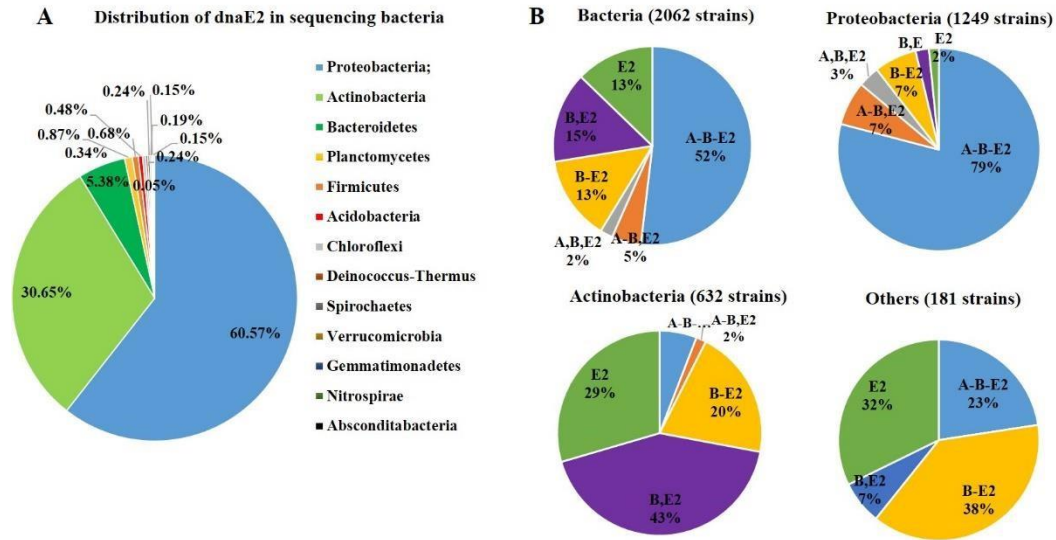

**Figure S6.** Distribution and location relationships of *imuA*, *imuB* and *dnaE2* genes in sequenced bacterial genome. (A) Distribution of *dnaE2*. The *dnaE2* is distributed in 13 bacterial phyla. (B) Location relationship of *imuA*, *imuB* and *dnaE2* in the 2062 genomes carrying *dnaE2*. A-B-E2: *imuA*, *imuB* and *dnaE2* genes coexist in the same genome and are adjacent to each other; A-B,E2: *imuA*, *imuB* and *dnaE2* genes coexist in the same genome and *imuA-imuB* are adjacent to each other, *dnaE2* is separated; A,B,E2: *imuA*, *imuB* and *dnaE2* genes coexist in the same genome and are separated to each other; B-E2: *imuB* and *dnaE2* genes coexist in the same genome and are adjacent to each other, *imuA* disappears; B,E2: *imuB* and *dnaE2* genes coexist in the same genome and are separated to each other, *imuA* disappears; E2: only a *dnaE2* gene, *imuA* and *imuB* disappear.

## Supplementary tables

**Table S1.** 81 genes downregulated by ImuA

|                                                | Pathway                                     | Gene ID   | Protein                                            | Function                            |
|------------------------------------------------|---------------------------------------------|-----------|----------------------------------------------------|-------------------------------------|
| Metabolism (14 genes)                          | Biosynthesis of other secondary metabolites | MXAN_1183 | Spermidine synthase                                | Spermidine synthesis                |
|                                                | Biosynthesis of other secondary metabolites | MXAN_1250 | Riboflavin-specific deaminase, C-terminal          | Riboflavin synthesis                |
|                                                | Biosynthesis of other secondary metabolites | MXAN_1348 | SAM-dependent methyltransferase                    | Methylation                         |
|                                                | Biosynthesis of other secondary metabolites | MXAN_1499 | Thiamin biosynthesis protein ThiF                  | Thiazole synthesis                  |
|                                                | Biosynthesis of other secondary metabolites | MXAN_3787 | SAM-dependent methyltransferase                    | Methylation synthesis               |
|                                                | Biosynthesis of other secondary metabolites | MXAN_6063 | Indole-3-glycerol-phosphate synthase               | Shikimate acid synthesis            |
|                                                | Biosynthesis of other secondary metabolites | MXAN_6629 | Prenyltransferase, ubia family                     | Bacterioruberin synthesis           |
|                                                | Carbohydrate metabolism                     | MXAN_5335 | Glycosyl transferase family 2                      | Polysaccharide synthesis            |
|                                                | Energy metabolism                           | MXAN_7213 | Cytochrome-c peroxidase                            | Antioxidant response                |
|                                                | Nucleotide metabolism                       | MXAN_1509 | diadenosine tetraphosphate (Ap4A) hydrolase        | Ap4A hydrolysis. sporulation        |
|                                                | Nucleotide metabolism                       | MXAN_2548 | Pseudouridine synthase                             | Pseudouridine synthesis             |
|                                                | Nucleotide metabolism                       | MXAN_3412 | dTMP kinase                                        | dTTP synthesis                      |
|                                                | Xenobiotics biodegradation and metabolism   | MXAN_0179 | Metallo-beta-lactamase family protein              | $\beta$ -lactams drug-resistance    |
|                                                | Xenobiotics biodegradation and metabolism   | MXAN_1079 | N-acetyltransferase                                | myriocin drug-resistance            |
| Environmental information processing (6 genes) | Membrane transport                          | MXAN_0562 | Phosphate-selective porin O and P                  | Phosphate transporter               |
|                                                | Membrane transport                          | MXAN_3356 | Oligopeptide transporter, OPT family               | transporters of small oligopeptides |
|                                                | Membrane transport                          | MXAN_5157 | Branched-chain amino acid transport protein (azld) | Amino acid transporter              |
|                                                | Membrane transport s                        | MXAN_6003 | ABC transporter, ABC-2 type                        | Export of drugs and carbohydrates   |
|                                                | Membrane transport                          | MXAN_7022 | MATE family efflux transporter                     | Drug/sodium antiporters             |



|                                           |                                  |                                         |                                                                |                                  |
|-------------------------------------------|----------------------------------|-----------------------------------------|----------------------------------------------------------------|----------------------------------|
|                                           | Membrane transport               | MXAN_7437                               | Cobalt-zinc-cadmium resistance protein CzcA                    | Heavy metal efflux pump          |
| Genetic information processing (34 genes) | Transcription                    | MXAN_0904                               | B12 binding domain/transcriptional regulator, merr family      | Transcription factor             |
|                                           | Transcription                    | MXAN_1510                               | DNA-directed RNA polymerase sigma-70 factor                    | RNA polymerase                   |
|                                           | Transcription                    | MXAN_1619                               | Deor family transcriptional regulator                          | Transcription factor             |
|                                           | Transcription                    | MXAN_2929                               | DNA-directed RNA polymerase sigma-70 factor                    | RNA polymerase                   |
|                                           | Transcription                    | MXAN_3582                               | Cold-shock protein cspd                                        | Transcription factor             |
|                                           | Transcription                    | MXAN_4068                               | Trna 2-thiouridine synthesizing protein A,tusa                 | Transcription factor             |
|                                           | Transcription                    | MXAN_4480                               | Transcriptional regulator                                      | Transcription factor             |
|                                           | Transcription                    | MXAN_7214                               | ECF subfamily RNA polymerase sigma factor 70                   | RNA polymerase                   |
|                                           | Translation                      | MXAN_1105                               | RNA-binding protein (yhby domain)                              | Translation factor               |
|                                           | Translation                      | MXAN_1266                               | Trna-hydroxylase miae                                          | Posttranscriptional modification |
|                                           | Translation                      | MXAN_3295                               | 30S ribosomal protein S12                                      | Ribosomal protein                |
|                                           | Translation                      | MXAN_3299                               | 30S ribosomal protein S10                                      | Ribosomal protein                |
|                                           | Translation                      | MXAN_3311                               | 50S ribosomal protein L5                                       | Ribosomal protein                |
|                                           | Translation                      | MXAN_3548                               | Trna (guanosine(37)-N1) methyltransferase, trmd                | Posttranscriptional modification |
|                                           | Translation                      | MXAN_3592                               | 50S ribosomal protein L35                                      | Ribosomal protein                |
|                                           | Translation                      | MXAN_3731                               | Trna isopentenyltransferase miaa                               | Posttranscriptional modification |
|                                           | Translation                      | MXAN_3739                               | 16S rrna (cytosine967-C5) methyltransferase                    | Posttranscriptional modification |
|                                           | Translation                      | MXAN_4642                               | Tlya family rrna (cytidine-2'-O)-methyltransferase             | Posttranscriptional modification |
|                                           | Translation                      | MXAN_4773                               | 50S ribosomal protein L32                                      | Ribosomal protein                |
|                                           | Translation                      | MXAN_5076                               | 50S ribosomal protein L25                                      | Ribosomal protein                |
|                                           | Folding, sorting and degradation | MXAN_0024                               | Ribonuclease R                                                 | RNA degradation                  |
|                                           | Folding, sorting and degradation | MXAN_2756                               | Serine protease/ trypsin-2                                     | Protein degradation              |
|                                           | Folding, sorting and degradation | MXAN_5779                               | Type 4 prepilin-like proteins leader peptide-processing enzyme | Posttranslational modification   |
|                                           | Folding, sorting and degradation | MXAN_6672                               | Molecular chaperone grpe                                       | Protein folding                  |
| DNA replication and repair                | MXAN_0246                        | DNA replication and repair protein RecF | Homologous recombination                                       |                                  |

|                            |                            |                      |                                         |                             |
|----------------------------|----------------------------|----------------------|-----------------------------------------|-----------------------------|
|                            | DNA replication and repair | MXAN_1388            | DNA recombination/repair protein RecA   | Homologous recombination    |
|                            | DNA replication and repair | MXAN_1441            | DNA recombination/repair protein RecA   | Homologous recombination    |
|                            | DNA replication and repair | MXAN_1930            | Recombination protein recR              | Homologous recombination    |
|                            | DNA replication and repair | MXAN_2574            | Ribonuclease HII                        | Primer excision             |
|                            | DNA replication and repair | MXAN_3010            | Site-specific recombinase XerC          | Chromosome dimer resolution |
|                            | DNA replication and repair | MXAN_3403            | 6-O-methylguanine DNA methyltransferase | Direct repair               |
|                            | DNA replication and repair | MXAN_3844            | Site-specific recombinase XerD          | Chromosome dimer resolution |
|                            | DNA replication and repair | MXAN_3982            | Error-prone DNA polymerase DnaE2        | Error-prone DNA replication |
|                            | DNA replication and repair | MXAN_3990            | Error-prone DNA polymerase ImuB         | Error-prone DNA replication |
| Unclassified<br>(27 genes) | Unclassified               | MXAN_3767            | Hypothetical protein                    |                             |
|                            | Unclassified               | MXAN_3770            | Hypothetical protein                    |                             |
|                            | Unclassified               | MXAN_3818            | TIGR02265 family protein                |                             |
|                            | Unclassified               | MXAN_3971            | Hypothetical protein                    |                             |
|                            | Unclassified               | MXAN_4631            | Rossmann fold protein, TIGR00730 family |                             |
|                            | Unclassified               | MXAN_0847            | Hypothetical protein                    |                             |
|                            | Unclassified               | MXAN_1144            | Hypothetical protein                    |                             |
|                            | Unclassified               | MXAN_1346            | Hypothetical protein                    |                             |
|                            | Unclassified               | MXAN_1625            | Hypothetical protein                    |                             |
|                            | Unclassified               | MXAN_1626            | Hypothetical protein                    |                             |
|                            | Unclassified               | MXAN_1634            | Hypothetical protein                    |                             |
|                            | Unclassified               | MXAN_1648            | Hypothetical protein                    |                             |
|                            | Unclassified               | MXAN_1657            | Hypothetical protein                    |                             |
|                            | Unclassified               | MXAN_2146            | Hypothetical protein                    |                             |
|                            | Unclassified               | MXAN_2561            | Hypothetical protein                    |                             |
|                            | Unclassified               | MXAN_3166            | Hypothetical protein                    |                             |
|                            | Unclassified               | MXAN_3223            | Hypothetical protein                    |                             |
|                            | Unclassified               | MXAN_3237            | Hypothetical protein                    |                             |
|                            | Unclassified               | MXAN_4485            | Hypothetical protein                    |                             |
|                            | Unclassified               | MXAN_4744            | Hypothetical protein                    |                             |
|                            | Unclassified               | MXAN_5088            | Hypothetical protein                    |                             |
|                            | Unclassified               | MXAN_5091            | Hypothetical protein                    |                             |
|                            | Unclassified               | MXAN_5126            | Hypothetical protein                    |                             |
|                            | Unclassified               | MXAN_5228            | Hypothetical protein                    |                             |
| Unclassified               | MXAN_5676                  | Hypothetical protein |                                         |                             |
| Unclassified               | MXAN_7191                  | Hypothetical protein |                                         |                             |
| Unclassified               | MXAN_7195                  | Hypothetical protein |                                         |                             |

**Table S2.** 179 genes upregulated by ImuA

|                          | Pathway                 | Gene ID                | Protein                                   | Function                                 |
|--------------------------|-------------------------|------------------------|-------------------------------------------|------------------------------------------|
| Metabolism<br>(33 genes) | Amino acid metabolism   | MXAN_3430              | Acyl-coa thioesterase                     | Phenylalanine metabolism                 |
|                          | Amino acid metabolism   | MXAN_5252              | Glutathione S-transferase                 | Glutathione metabolism                   |
|                          | Amino acid metabolism   | MXAN_5425              | Poly-gamma-glutamate biosynthesis protein | Capsule synthesis                        |
|                          | Amino acid metabolism   | MXAN_5741              | D-alanine--D-alanine ligase               | D-Alanine metabolism                     |
|                          | Amino acid metabolism   | MXAN_6166              | Serine dehydratase                        | Glycine, serine and threonine metabolism |
|                          | Amino acid metabolism   | MXAN_7405              | Proline dehydrogenase                     | Proline metabolism                       |
|                          | Carbohydrate metabolism | MXAN_0040              | Glucose dehydrogenase                     | Pentose phosphate pathway                |
|                          | Carbohydrate metabolism | MXAN_0210              | Lytic transglycosylase                    | Peptidoglycan degradation                |
|                          | Carbohydrate metabolism | MXAN_0456              | Alcohol dehydrogenase                     | Glycolysis                               |
|                          | Carbohydrate metabolism | MXAN_2969              | Acyl-coA dehydrogenase                    | Propanoate metabolism                    |
|                          | Carbohydrate metabolism | MXAN_3363              | Lytic transglycosylase                    | Peptidoglycan degradation                |
|                          | Carbohydrate metabolism | MXAN_4946              | Transglycosylase                          | Glyoxylate cycle                         |
|                          | Carbohydrate metabolism | MXAN_5222              | Succinate dehydrogenase                   | TCA cycle                                |
|                          | Carbohydrate metabolism | MXAN_5629              | Alcohol dehydrogenase                     | Glycolysis                               |
|                          | Carbohydrate metabolism | MXAN_5692              | Murein L,D-transpeptidase                 | Peptidoglycan synthesis                  |
|                          | Carbohydrate metabolism | MXAN_6802              | NADP-dependent alcohol dehydrogenase      | Glycolysis                               |
|                          | Energy metabolism       | MXAN_2246              | Fad oxidoreductase                        | Respiratory chain                        |
|                          | Energy metabolism       | MXAN_3414              | Cytochrome c                              | Respiratory chain                        |
|                          | Lipid metabolism        | MXAN_1362              | Cardiolipin synthase B                    | Glycerophospholipid metabolism           |
|                          | Lipid metabolism        | MXAN_2240              | Zinc-binding dehydrogenase                | Fatty acid elongation                    |
| Lipid metabolism         | MXAN_4882               | Metallophosphoesterase | Phospholipid metabolism                   |                                          |
| Lipid metabolism         | MXAN_6753               | Phospholipase D family | Glycerophospholipid metabolism            |                                          |
| Lipid metabolism         | MXAN_6764               | Carboxylesterase       | Carboxylic esters degradation             |                                          |

|                                                 |                                           |           |                                                    |                                   |
|-------------------------------------------------|-------------------------------------------|-----------|----------------------------------------------------|-----------------------------------|
|                                                 | Metabolism of cofactors and vitamins      | MXAN_0202 | Amine oxidase, flavin-containing                   | Porphyrin synthesis               |
|                                                 | Metabolism of cofactors and vitamins      | MXAN_3951 | MBL fold metallo hydrolase                         | Folate biosynthesis               |
|                                                 | Metabolism of cofactors and vitamins      | MXAN_2228 | Pyrrroquinoline-quinone synthase                   | Pyrrroquinoline quinone synthesis |
|                                                 | Metabolism of cofactors and vitamins      | MXAN_6110 | 4-diphosphocytidyl-2C-methyl-D-erythritol synthase | Folate synthesis                  |
|                                                 | Metabolism of cofactors and vitamins      | MXAN_7412 | Molybdenum cofactor guanylyltransferase            | Folate synthesis                  |
|                                                 | Nucleotide metabolism                     | MXAN_0444 | Pyridine nucleotide-disulfide oxidoreductase       | Pyrimidine metabolism             |
|                                                 | Nucleotide metabolism                     | MXAN_7155 | Phosphoribosyltransferase                          | Ribo-nucleoside synthesis         |
|                                                 | Xenobiotics biodegradation and metabolism | MXAN_0178 | Rhodanese-like domain protein                      | Cyanide detoxification            |
|                                                 | Xenobiotics biodegradation and metabolism | MXAN_0432 | Metallo beta lactamase                             | Beta lactam resistance            |
|                                                 | Xenobiotics biodegradation and metabolism | MXAN_1701 | Dyp-type peroxidase family protein                 | Lignin oxidation                  |
| Environmental information processing (17 genes) | Membrane transport                        | MXAN_0164 | Potassium-transporting atpase subunit A            | Potassium ion transport           |
|                                                 | Membrane transport                        | MXAN_0166 | Potassium-transporting atpase subunit C            | Potassium ion transport           |
|                                                 | Membrane transport                        | MXAN_0177 | Taue protein                                       | Anions transport                  |
|                                                 | Membrane transport                        | MXAN_0641 | Tspo/MBR family protein                            | Anions transport                  |
|                                                 | Membrane transport                        | MXAN_0655 | Organic hydroperoxide resistance protein           | Oxidative shock                   |
|                                                 | Membrane transport                        | MXAN_1789 | ABC transporter, peptidase, C39 family             | Bacteriocin transport             |
|                                                 | Membrane transport                        | MXAN_1790 | ABC transporter ATP-binding protein                | Glutathione export                |
|                                                 | Membrane transport                        | MXAN_2233 | MFS transporter                                    | Sugar transport                   |
|                                                 | Membrane transport                        | MXAN_2583 | VTC domain-containing protein                      | Vacuolar transport                |
|                                                 | Membrane transport                        | MXAN_3225 | Sugar ABC transporter substrate-binding protein    | Sugar transport                   |
|                                                 | Membrane transport                        | MXAN_4342 | BON domain-containing protein                      | Osmotic shock                     |

|                                           |                                  |           |                                                  |                                |
|-------------------------------------------|----------------------------------|-----------|--------------------------------------------------|--------------------------------|
|                                           | Membrane transport               | MXAN_4606 | Carbohydrate-binding protein                     | Sugar transport                |
|                                           | Membrane transport               | MXAN_5555 | Iron ABC transporter                             | Iron transport                 |
|                                           | Membrane transport               | MXAN_6156 | Cytochrome c-type biogenesis protein/thioredoxin | Transmembrane electron carrier |
|                                           | Membrane transport               | MXAN_6552 | Peptide ABC transporter permease                 | Peptides/nickel transport      |
|                                           | Membrane transport               | MXAN_7380 | CBS domain-containing protein                    | Chloride channel               |
|                                           | Signal transduction              | MXAN_7001 | Response regulator                               | Two component system           |
| Cellular processes                        | Cell motility                    | MXAN_3375 | Gliding motility protein                         | Cell motility                  |
|                                           | Cell growth and death            | MXAN_7262 | fruiting body developmental protein R            | fruiting body development      |
| Genetic information processing (30 genes) | Transcription                    | MXAN_1757 | Lysr family transcriptional regulator            | Transcription factor           |
|                                           | Transcription                    | MXAN_2023 | Bola family transcriptional regulator            | Transcription factor           |
|                                           | Transcription                    | MXAN_2842 | Lysr family transcriptional regulator            | Transcription factor           |
|                                           | Transcription                    | MXAN_2957 | DNA-directed RNA polymerase sigma-70 factor      | RNA polymerase                 |
|                                           | Transcription                    | MXAN_4263 | Tetr family transcriptional regulator            | Transcription factor           |
|                                           | Transcription                    | MXAN_5101 | RNA polymerase                                   | RNA polymerase                 |
|                                           | Transcription                    | MXAN_5480 | Lysr family transcriptional regulator            | Transcription factor           |
|                                           | Transcription                    | MXAN_6173 | ECF subfamily RNA polymerase sigma factor        | RNA polymerase                 |
|                                           | Transcription                    | MXAN_0672 | Cold-shock protein                               | Transcription factor           |
|                                           | Translation                      | MXAN_5427 | Archease                                         | RNA ligation                   |
|                                           | Folding, sorting and degradation | MXAN_0780 | Membrane-bound clpp-class protease               | Protein degradation            |
|                                           | Folding, sorting and degradation | MXAN_0934 | Peptidase S1                                     | Protein degradation            |
|                                           | Folding, sorting and degradation | MXAN_1159 | Protease                                         | Protein degradation            |
|                                           | Folding, sorting and degradation | MXAN_1650 | Peptidase S1                                     | Protein degradation            |
|                                           | Folding, sorting and degradation | MXAN_1967 | Peptidase S8                                     | Protein degradation            |

|                         |                                  |           |                                                                     |                      |
|-------------------------|----------------------------------|-----------|---------------------------------------------------------------------|----------------------|
|                         | Folding, sorting and degradation | MXAN_2221 | Protease                                                            | Protein degradation  |
|                         | Folding, sorting and degradation | MXAN_2790 | Protease                                                            | Protein degradation  |
|                         | Folding, sorting and degradation | MXAN_2791 | Protease                                                            | Protein degradation  |
|                         | Folding, sorting and degradation | MXAN_3402 | Peptidase S11                                                       | Protein degradation  |
|                         | Folding, sorting and degradation | MXAN_5231 | CPBP family intramembrane metalloprotease domain-containing protein | Protein degradation  |
|                         | Folding, sorting and degradation | MXAN_5887 | Serine protease                                                     | Protein degradation  |
|                         | Folding, sorting and degradation | MXAN_6205 | Collagenase                                                         | Protein degradation  |
|                         | DNA replication and repair       | MXAN_1759 | DNA alkylation repair protein                                       | Excision repair      |
|                         | DNA replication and repair       | MXAN_1901 | DDE transposase                                                     | DNA transposition    |
|                         | DNA replication and repair       | MXAN_1952 | RadC                                                                | DNA repair           |
|                         | DNA replication and repair       | MXAN_3347 | HNH endonuclease                                                    | Excision repair      |
|                         | DNA replication and repair       | MXAN_5220 | DNA-3-methyladenine glycosylase II                                  | Base excision repair |
|                         | DNA replication and repair       | MXAN_6075 | DNA helicase Lhr                                                    | DNA repair           |
|                         | DNA replication and repair       | MXAN_6425 | Endonuclease III Base excision DNA repair protein                   | Base excision repair |
| Unclassified (98 genes) | Unclassified                     | MXAN_0022 | Hypothetical protein                                                | Unknown function     |
|                         | Unclassified                     | MXAN_0069 | Hypothetical protein                                                | Unknown function     |
|                         | Unclassified                     | MXAN_0187 | Hypothetical protein                                                | Unknown function     |
|                         | Unclassified                     | MXAN_0192 | Hypothetical protein                                                | Unknown function     |
|                         | Unclassified                     | MXAN_0324 | Deda family protein                                                 | Unknown function     |
|                         | Unclassified                     | MXAN_0394 | Hypothetical protein                                                | Unknown function     |
|                         | Unclassified                     | MXAN_0431 | Hypothetical protein                                                | Unknown function     |
|                         | Unclassified                     | MXAN_0443 | Hypothetical protein                                                | Unknown function     |
|                         | Unclassified                     | MXAN_0466 | Hypothetical protein                                                | Unknown function     |
|                         | Unclassified                     | MXAN_0488 | Hypothetical protein                                                | Unknown function     |
|                         | Unclassified                     | MXAN_0536 | Hypothetical protein                                                | Unknown function     |
|                         | Unclassified                     | MXAN_0545 | Hypothetical protein                                                | Unknown function     |
|                         | Unclassified                     | MXAN_0551 | Hypothetical protein                                                | Unknown function     |
|                         | Unclassified                     | MXAN_0594 | Hypothetical protein                                                | Unknown function     |
|                         | Unclassified                     | MXAN_0702 | Hypothetical protein                                                | Unknown function     |
|                         | Unclassified                     | MXAN_0905 | Hypothetical protein                                                | Unknown function     |
|                         | Unclassified                     | MXAN_0929 | Hypothetical protein                                                | Unknown function     |
|                         | Unclassified                     | MXAN_1045 | Hypothetical protein                                                | Unknown function     |



|              |           |                      |                  |
|--------------|-----------|----------------------|------------------|
| Unclassified | MXAN_5997 | Hypothetical protein | Unknown function |
| Unclassified | MXAN_6098 | Hypothetical protein | Unknown function |
| Unclassified | MXAN_6165 | Hypothetical protein | Unknown function |
| Unclassified | MXAN_6219 | Hypothetical protein | Unknown function |
| Unclassified | MXAN_6230 | Hypothetical protein | Unknown function |
| Unclassified | MXAN_6272 | Hypothetical protein | Unknown function |
| Unclassified | MXAN_6381 | Hypothetical protein | Unknown function |
| Unclassified | MXAN_6389 | Hypothetical protein | Unknown function |
| Unclassified | MXAN_6440 | Hypothetical protein | Unknown function |
| Unclassified | MXAN_6500 | Hypothetical protein | Unknown function |
| Unclassified | MXAN_6581 | Hypothetical protein | Unknown function |
| Unclassified | MXAN_6585 | Hypothetical protein | Unknown function |
| Unclassified | MXAN_6752 | Hypothetical protein | Unknown function |
| Unclassified | MXAN_6817 | Hypothetical protein | Unknown function |
| Unclassified | MXAN_6837 | Hypothetical protein | Unknown function |
| Unclassified | MXAN_6880 | Hypothetical protein | Unknown function |
| Unclassified | MXAN_6888 | Hypothetical protein | Unknown function |
| Unclassified | MXAN_6928 | Hypothetical protein | Unknown function |
| Unclassified | MXAN_7030 | Hypothetical protein | Unknown function |
| Unclassified | MXAN_7032 | Hypothetical protein | Unknown function |
| Unclassified | MXAN_7098 | Hypothetical protein | Unknown function |
| Unclassified | MXAN_7100 | Hypothetical protein | Unknown function |
| Unclassified | MXAN_7231 | Hypothetical protein | Unknown function |
| Unclassified | MXAN_7284 | Hypothetical protein | Unknown function |
| Unclassified | MXAN_7379 | Hypothetical protein | Unknown function |
| Unclassified | MXAN_7384 | Hypothetical protein | Unknown function |
| Unclassified | MXAN_7386 | Hypothetical protein | Unknown function |
| Unclassified | MXAN_7425 | Hypothetical protein | Unknown function |
| Unclassified | MXAN_7466 | Hypothetical protein | Unknown function |



**Table S3.** Distribution of *dnaE2* in bacteria and its coexistence with *imuA*, *imuB*, *recA*, *recO*, *recR*, *dnaN*, *umuC* and *umuD* genes

| Distribution of <i>dnaE2</i> in bacteria |       |              | Bacteria with <i>dnaE2</i> (2062 strains)                       |        |        |      |      |     |             |             |             |              |             |             |              |             |             |
|------------------------------------------|-------|--------------|-----------------------------------------------------------------|--------|--------|------|------|-----|-------------|-------------|-------------|--------------|-------------|-------------|--------------|-------------|-------------|
| Phylum                                   | Total | <i>dnaE2</i> | Arrangement of <i>imuA</i> , <i>imuB</i> and <i>dnaE2</i> genes |        |        |      |      |     | <i>recA</i> | <i>recO</i> | <i>recR</i> | <i>dna N</i> | <i>umuC</i> | <i>umuD</i> | <i>umuCD</i> | <i>imuA</i> | <i>imuB</i> |
|                                          |       |              | A-B-E2                                                          | A-B,E2 | A,B,E2 | B-E2 | B,E2 | E2  |             |             |             |              |             |             |              |             |             |
| <i>Absconditabacteria</i>                | 2     | 1            | 1                                                               | 0      | 0      | 0    | 0    | 0   | 1           | 1           | 1           | 1            | 0           | 0           | 0            | 1           | 1           |
| <i>Acidobacteria</i>                     | 15    | 10           | 7                                                               | 0      | 0      | 2    | 0    | 1   | 10          | 10          | 10          | 10           | 0           | 0           | 0            | 7           | 9           |
| <i>Actinobacteria</i>                    | 862   | 632          | 37                                                              | 10     | 0      | 130  | 269  | 186 | 627         | 629         | 628         | 629          | 35          | 34          | 31           | 48          | 448         |
| <i>Bacteroidetes</i>                     | 391   | 111          | 25                                                              | 0      | 0      | 57   | 0    | 30  | 110         | 110         | 110         | 111          | 39          | 32          | 30           | 25          | 66          |
| <i>Chloroflexi</i>                       | 32    | 7            | 0                                                               | 0      | 0      | 1    | 3    | 4   | 7           | 7           | 7           | 7            | 0           | 0           | 0            | 0           | 4           |
| <i>Deinococcus - Thermus</i>             | 33    | 5            | 0                                                               | 0      | 0      | 1    | 4    |     | 4           | 5           | 5           | 5            | 0           | 1           | 0            | 0           | 5           |
| <i>Firmicutes</i>                        | 885   | 14           | 0                                                               | 0      | 0      | 1    | 3    | 9   | 13          | 13          | 13          | 13           | 1           | 0           | 0            | 0           | 4           |
| <i>Gemmatimonadetes</i>                  | 3     | 3            | 1                                                               | 0      | 0      | 0    | 1    | 1   | 3           | 3           | 3           | 3            | 0           | 0           | 0            | 1           | 2           |
| <i>Nitrospirae</i>                       | 10    | 3            | 0                                                               | 0      | 0      | 2    | 0    | 1   | 3           | 3           | 3           | 3            | 30          | 0           | 0            | 0           | 2           |
| <i>Planctomycetes</i>                    | 46    | 18           | 6                                                               | 0      | 0      | 2    | 0    | 10  | 18          | 16          | 16          | 18           | 1           | 0           | 0            | 16          | 17          |
| <i>Proteobacteria</i>                    | 2897  | 1249         | 1002                                                            | 89     | 43     | 86   | 27   | 20  | 1243        | 1241        | 1241        | 1243         | 194         | 219         | 172          | 1135        | 1229        |
| <i>Spirochaetes</i>                      | 89    | 5            | 0                                                               | 0      | 0      | 2    | 0    | 3   | 5           | 5           | 5           | 5            | 0           | 0           | 0            |             | 2           |
| <i>Verrucomicrobia</i>                   | 16    | 4            | 1                                                               | 0      | 0      | 2    | 1    | 0   | 4           | 4           | 4           | 4            | 0           | 0           | 0            | 1           | 4           |
| Others                                   | 826   | 0            |                                                                 |        |        |      |      |     |             |             |             |              |             |             |              |             |             |
| Total                                    | 6107  | 2062         | 1080                                                            | 99     | 43     | 286  | 308  | 265 | 2048        | 2047        | 2046        | 2052         | 300         | 286         | 233          | 1234        | 1793        |
